# Supplementary material for: Biallelic VARS variants cause developmental encephalopathy with microcephaly that is recapitulated in vars knockout zebrafish
Source: PubMed Central journal article supplement (PMC6372652; doi:10.1038/s41467-018-07953-w), 2019-02-12

1 dpf *vars+/-*

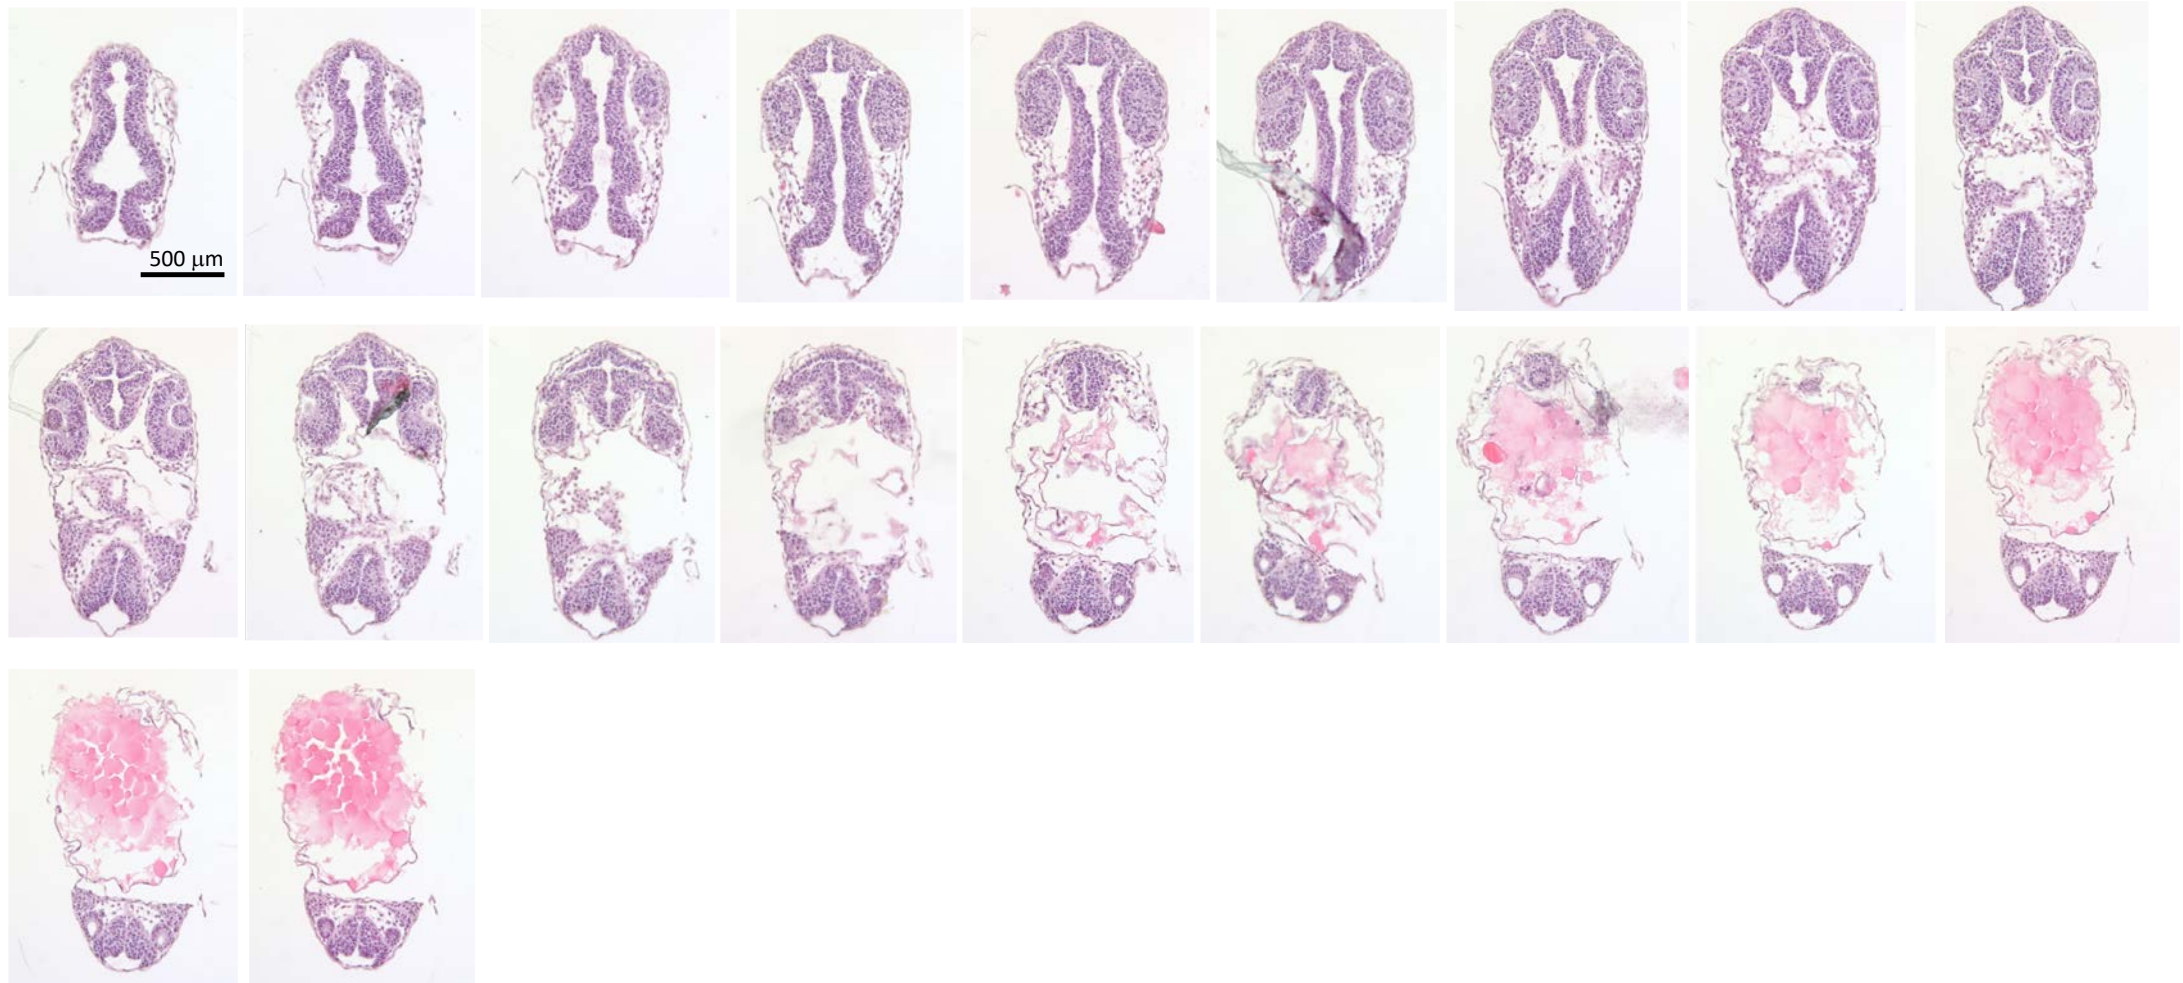

1 dpf *vars+/-*

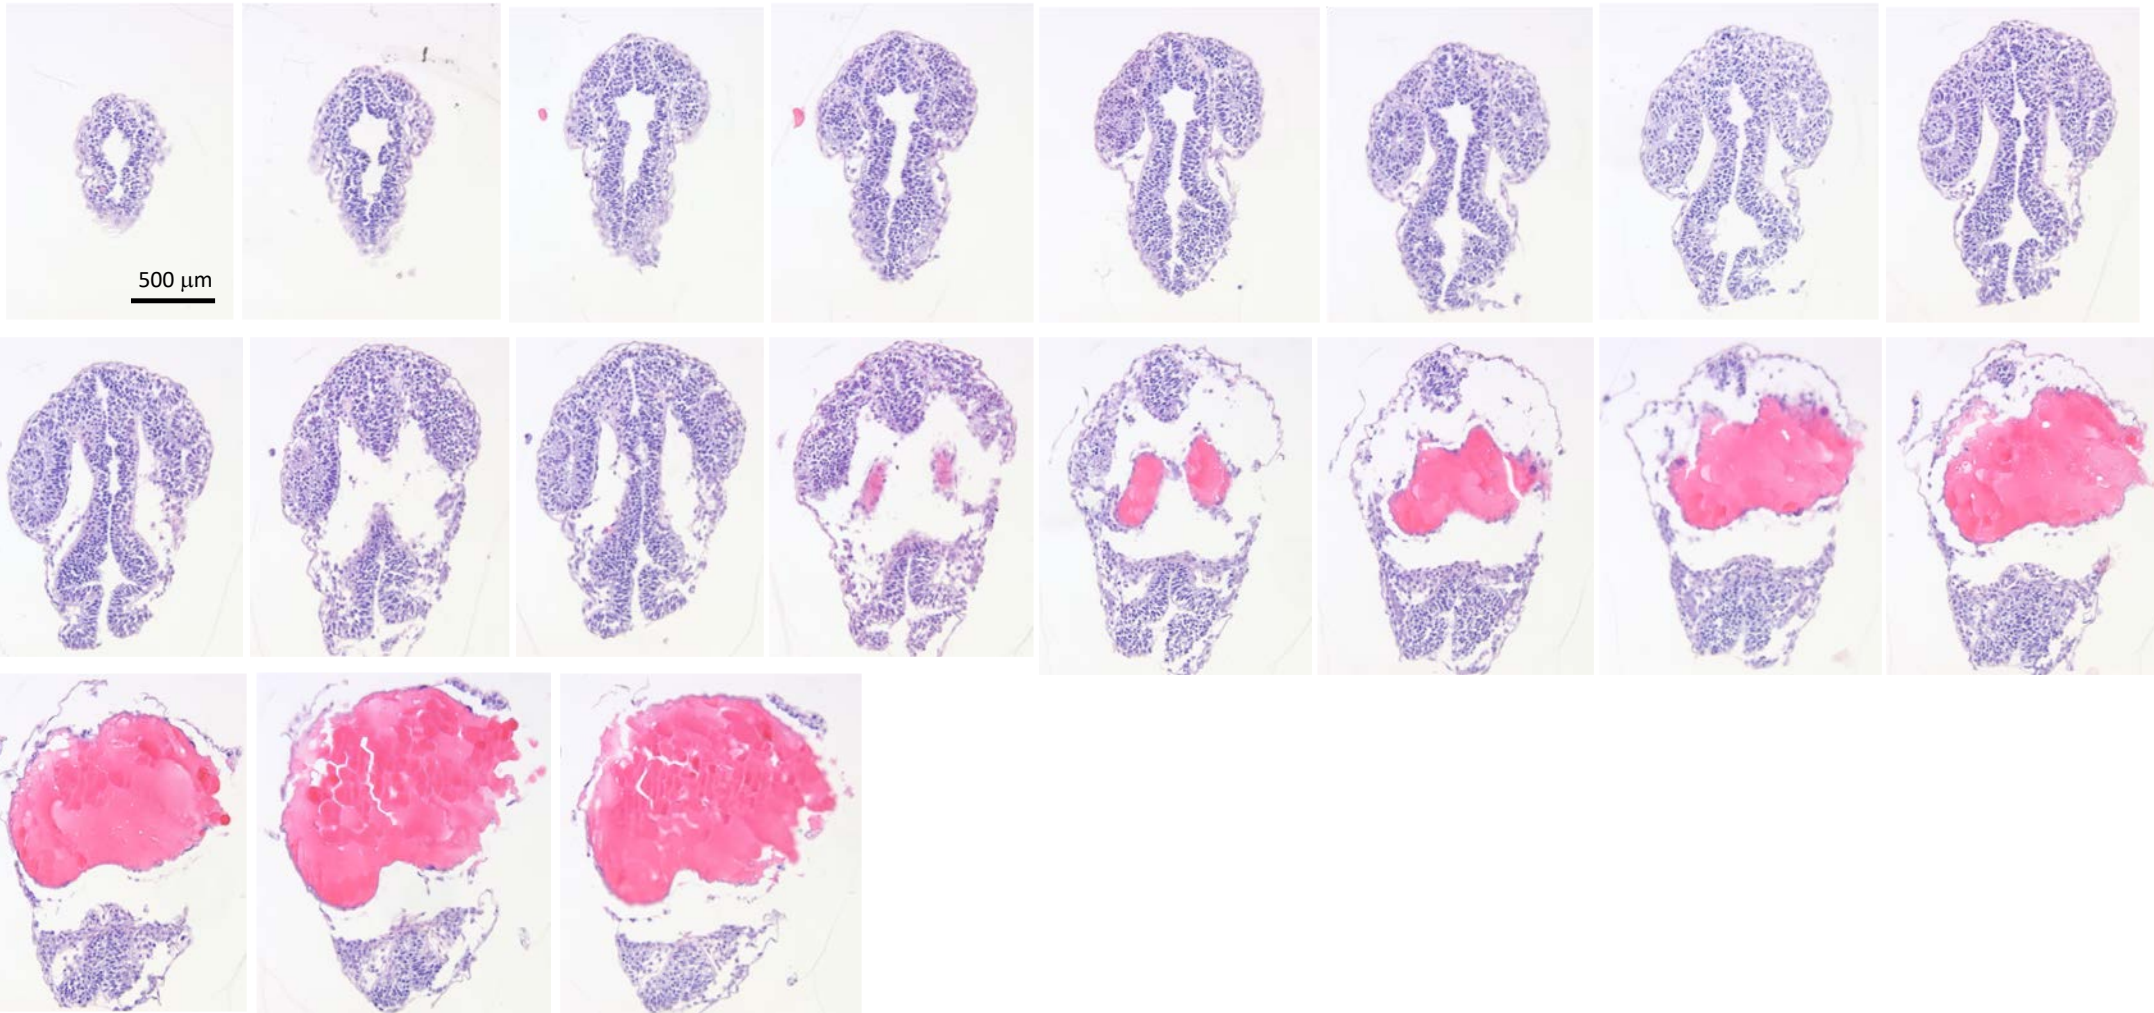

1 dpf *vars-/-*

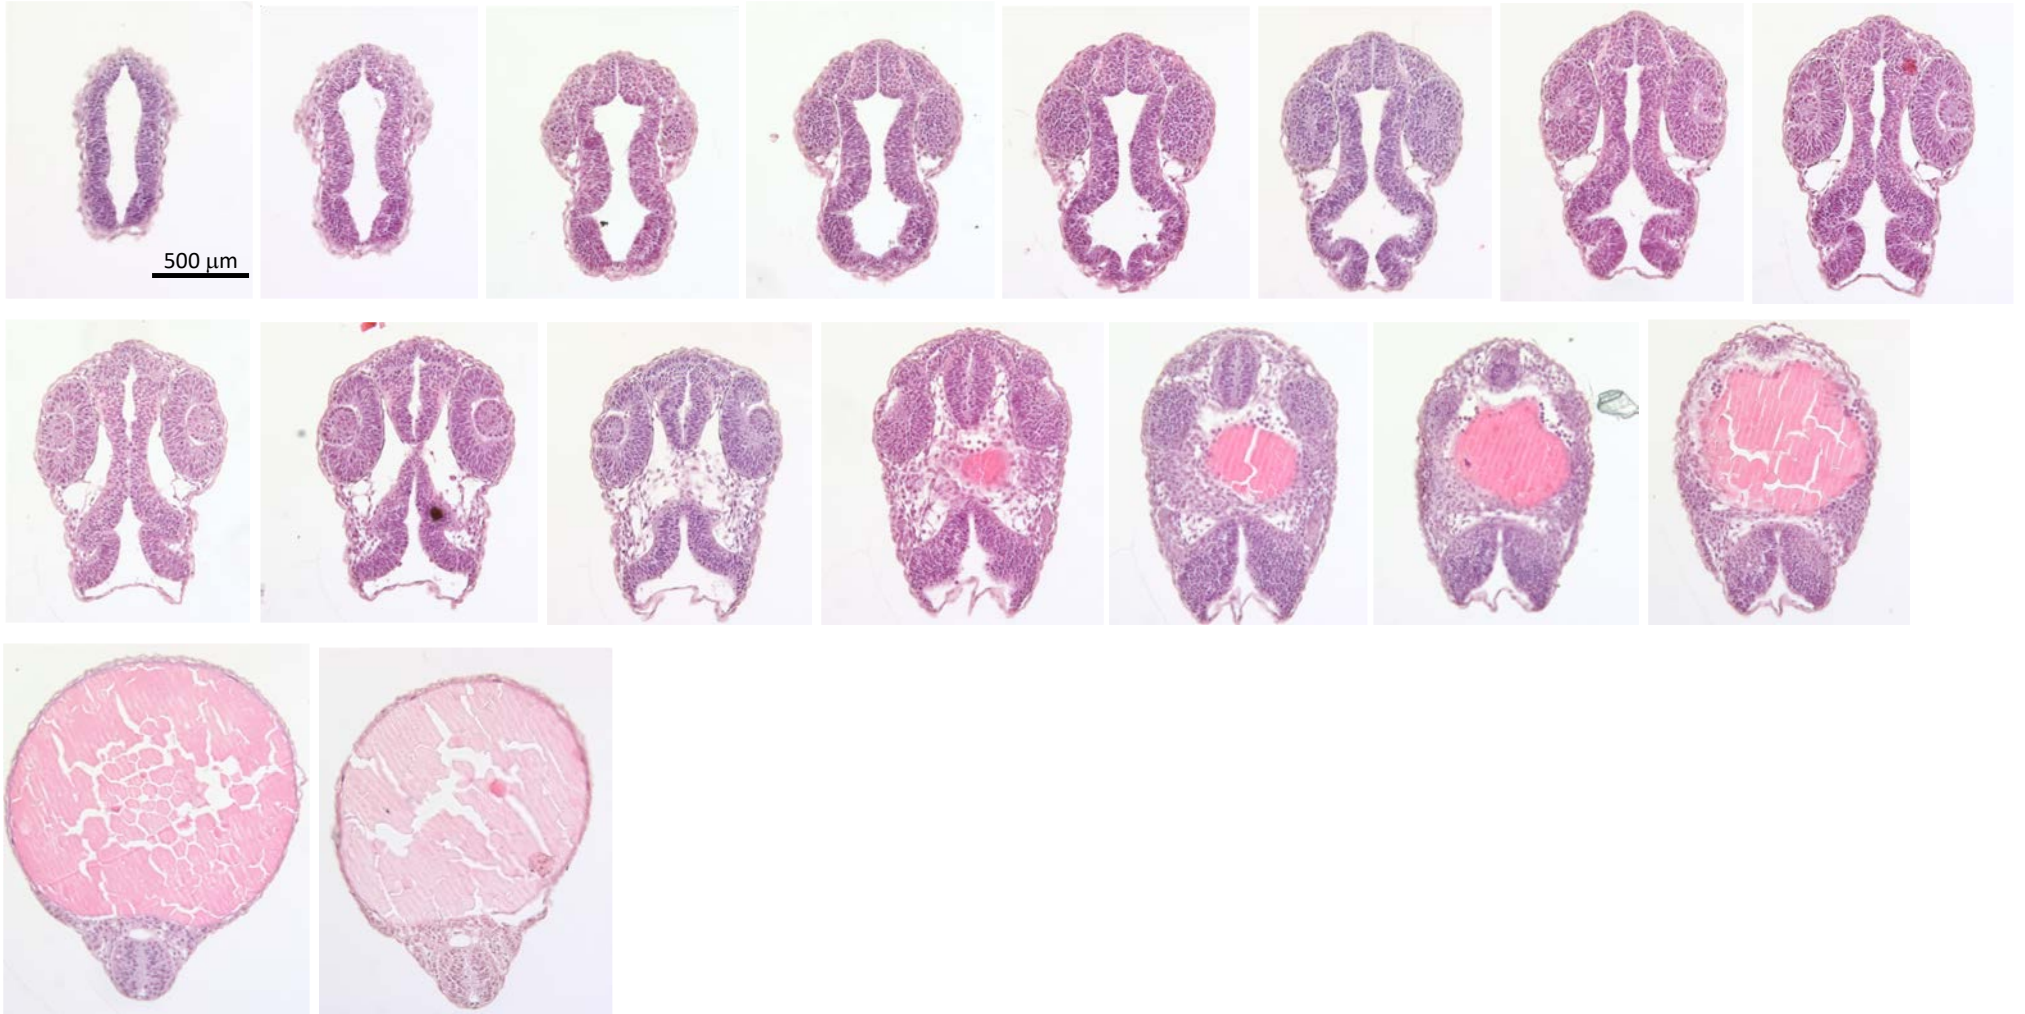

2 dpf *vars+/-*

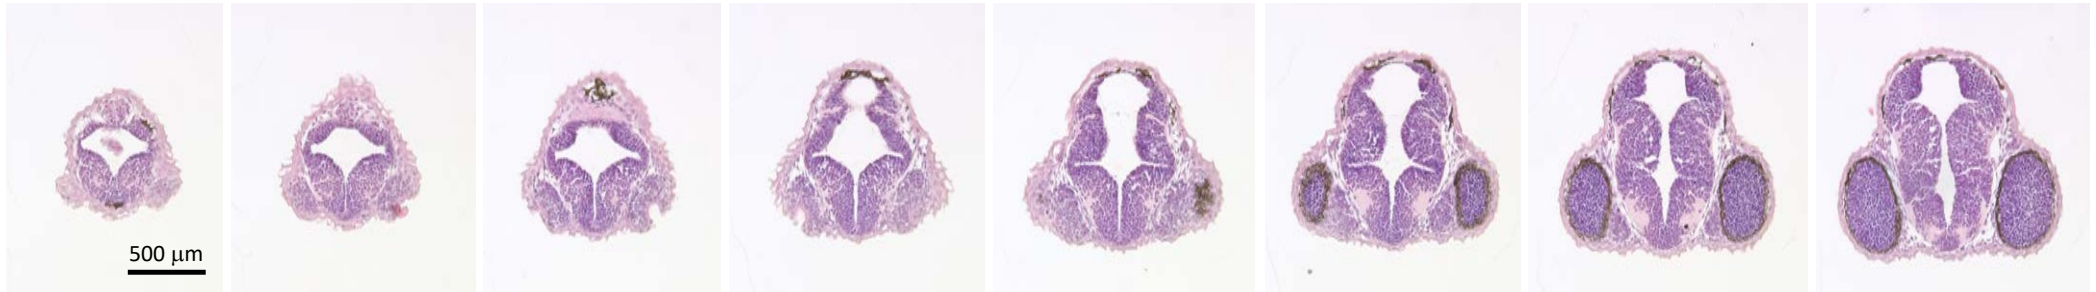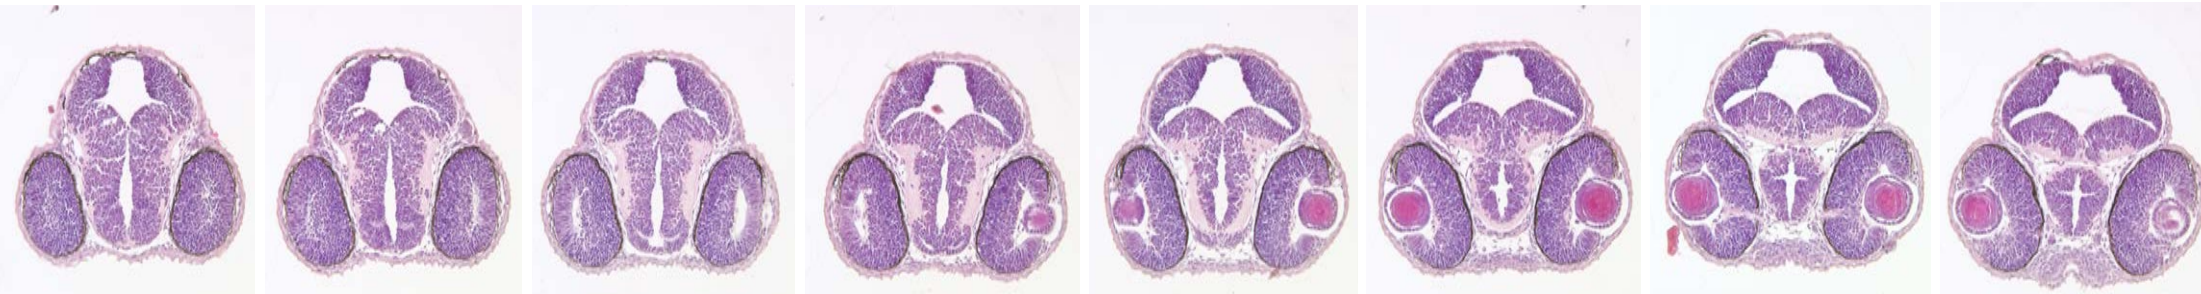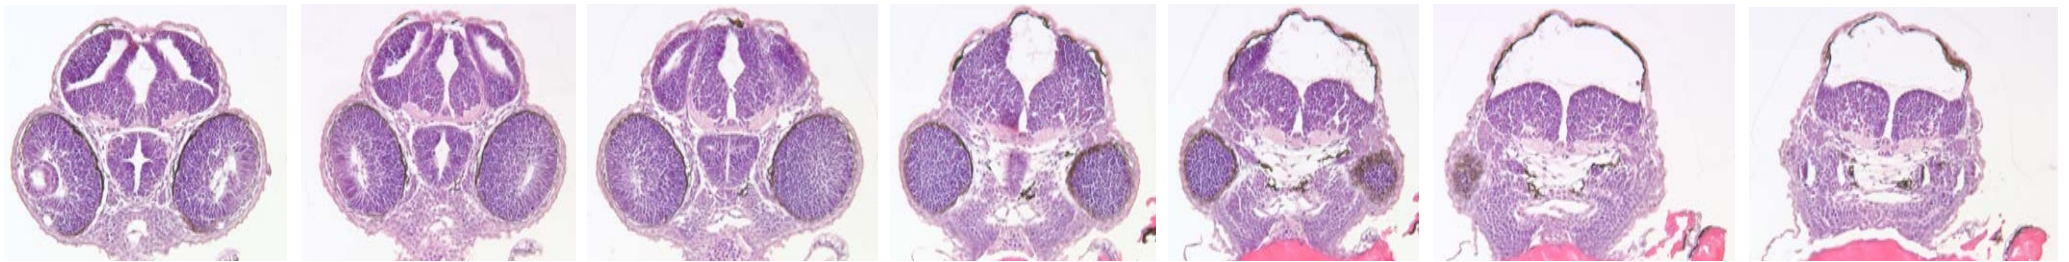

2 dpf *vars+/-*

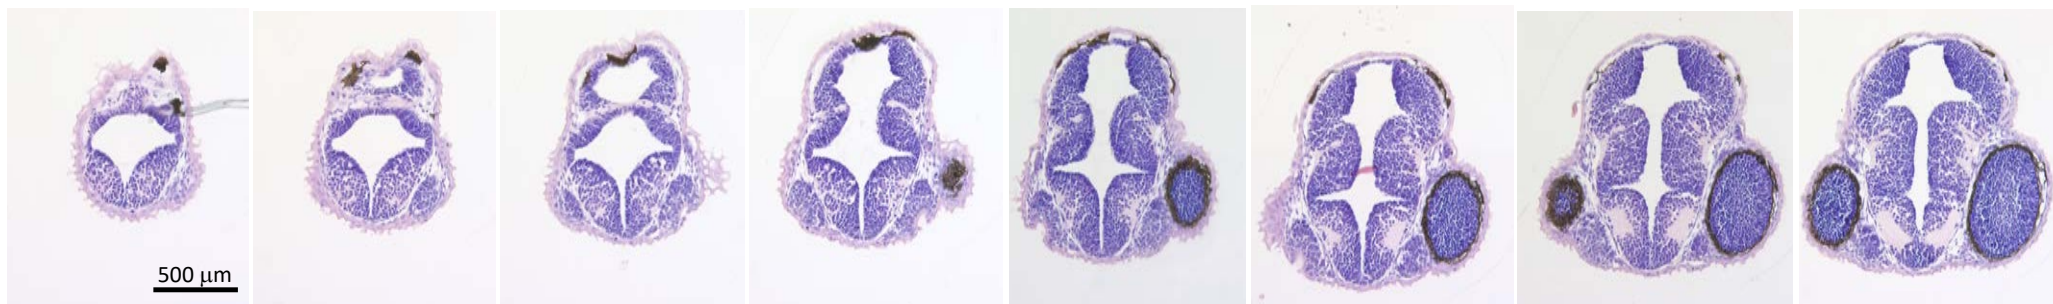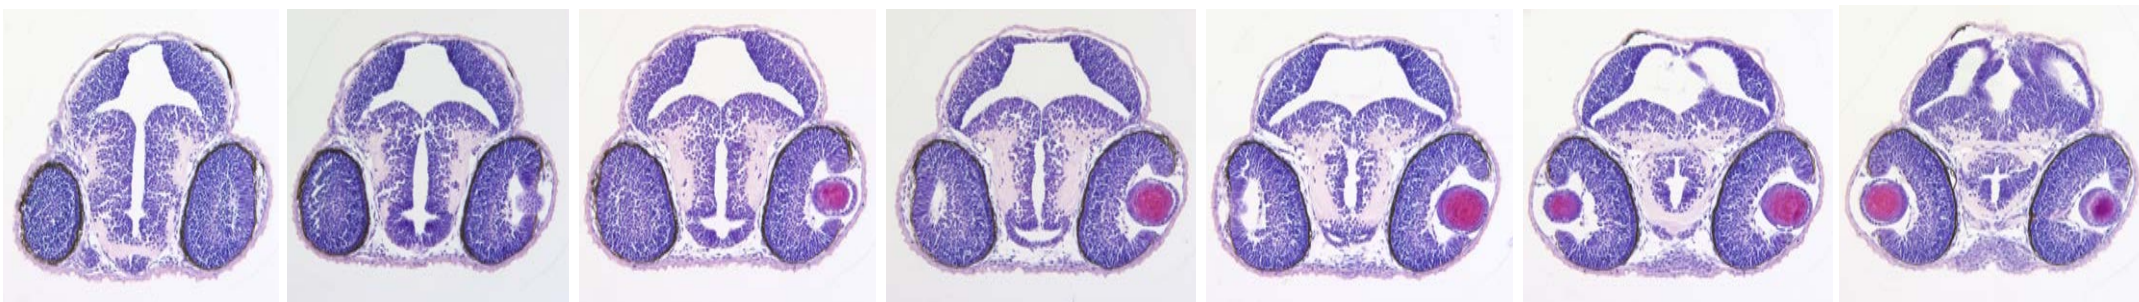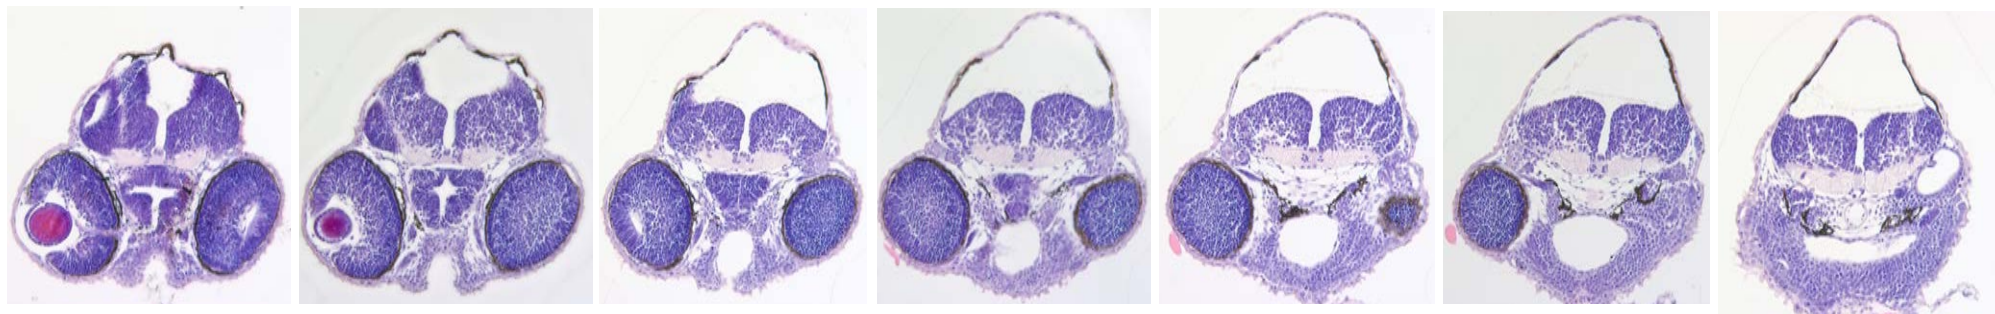

# 2 dpf *vars-/-*

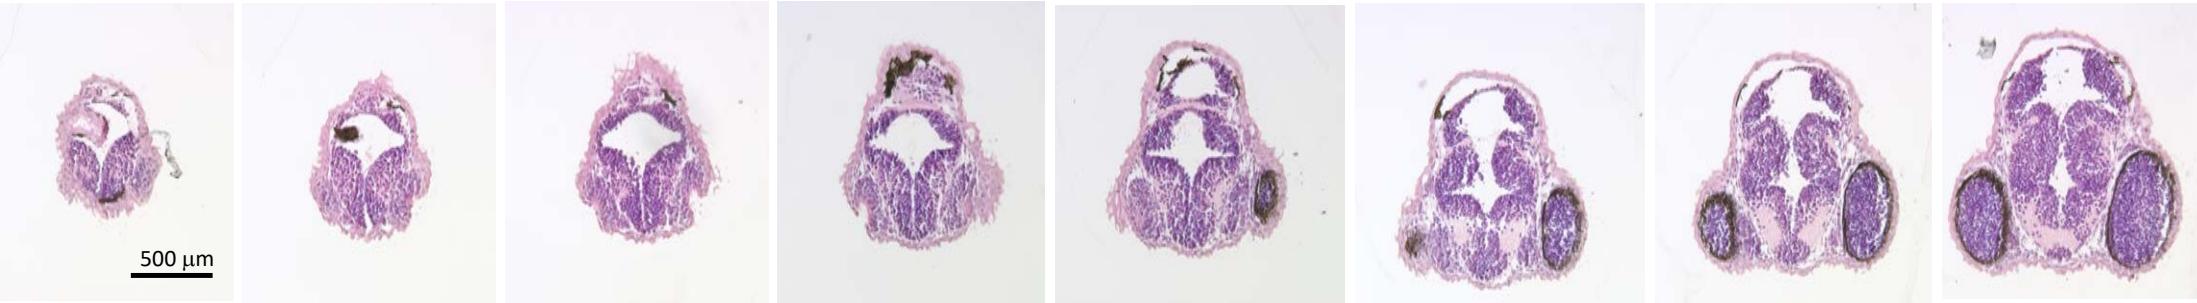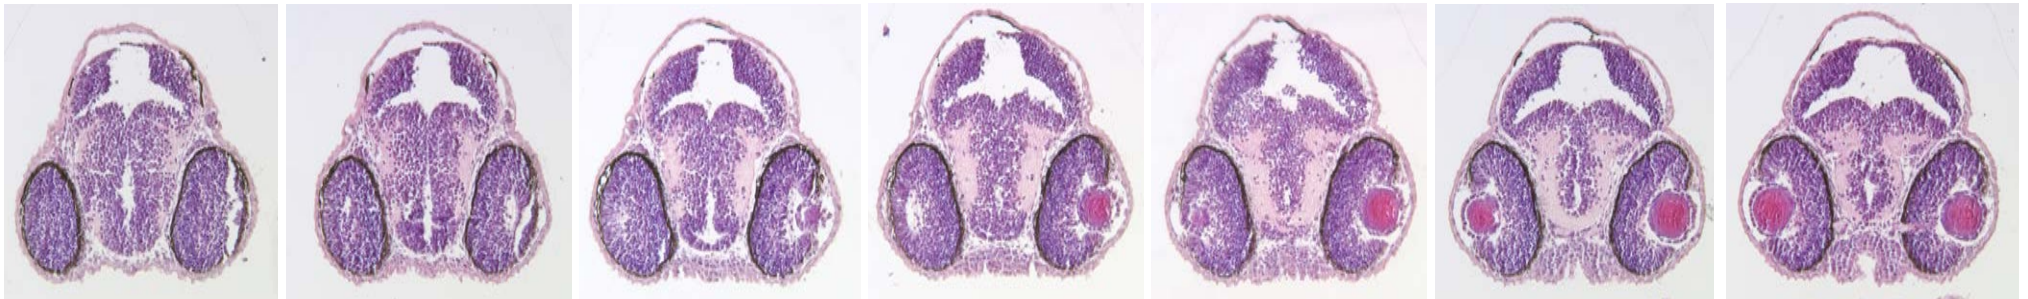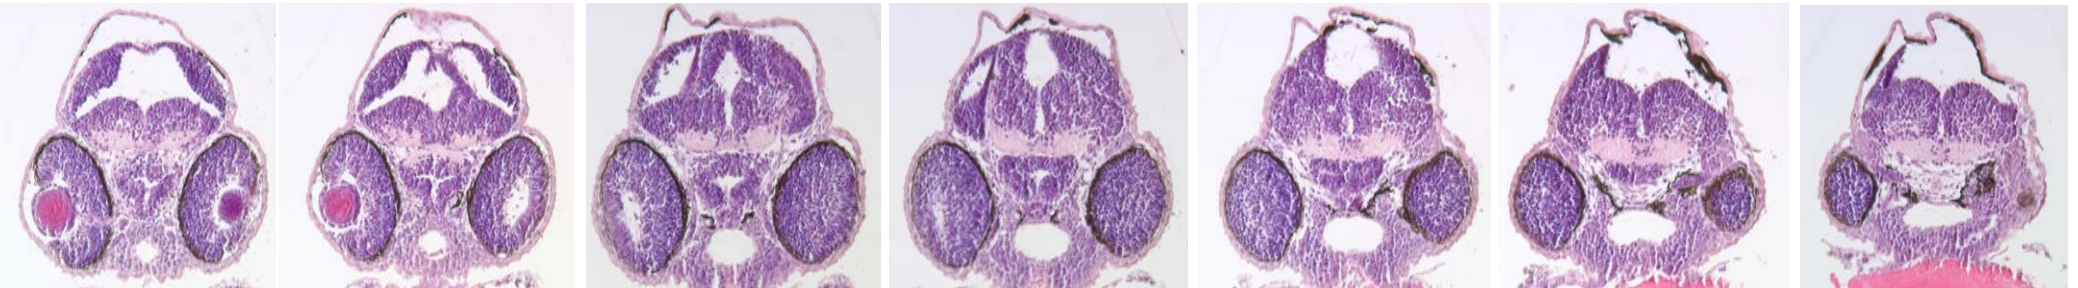

3 dpf *vars+/-*

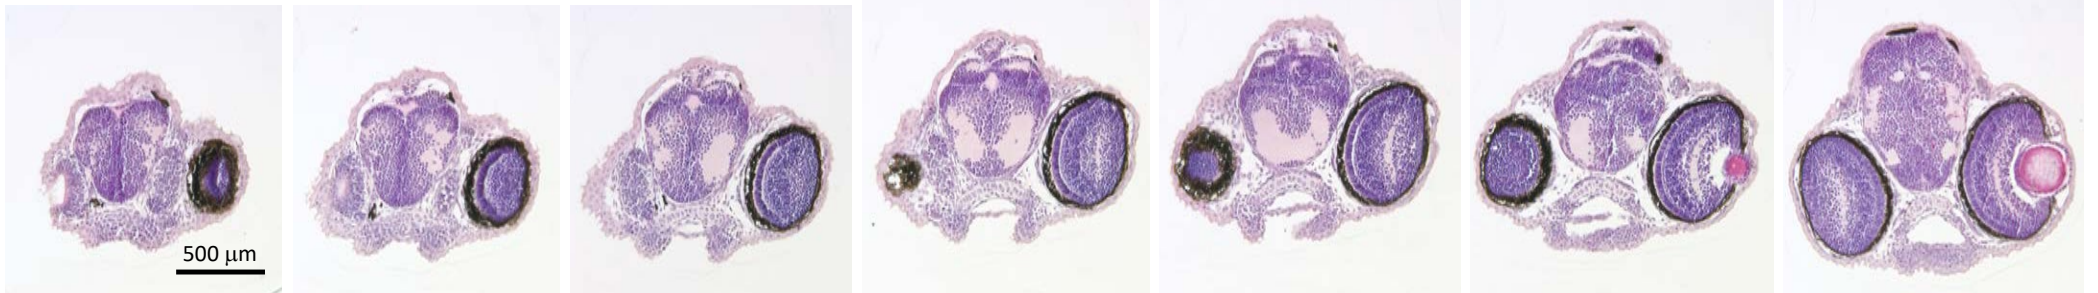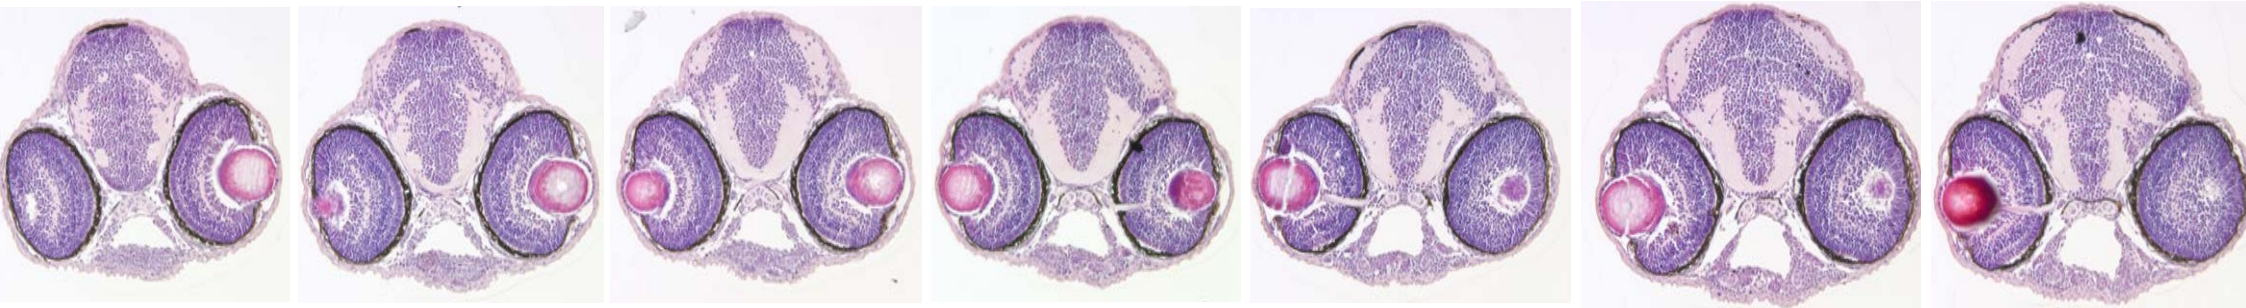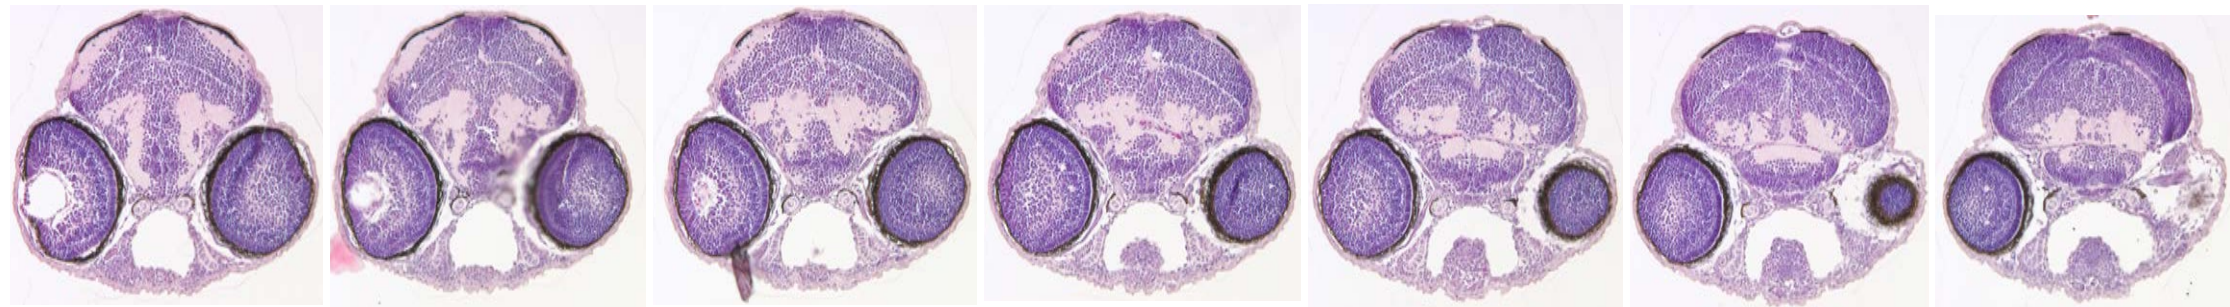

3 dpf *vars+/-*

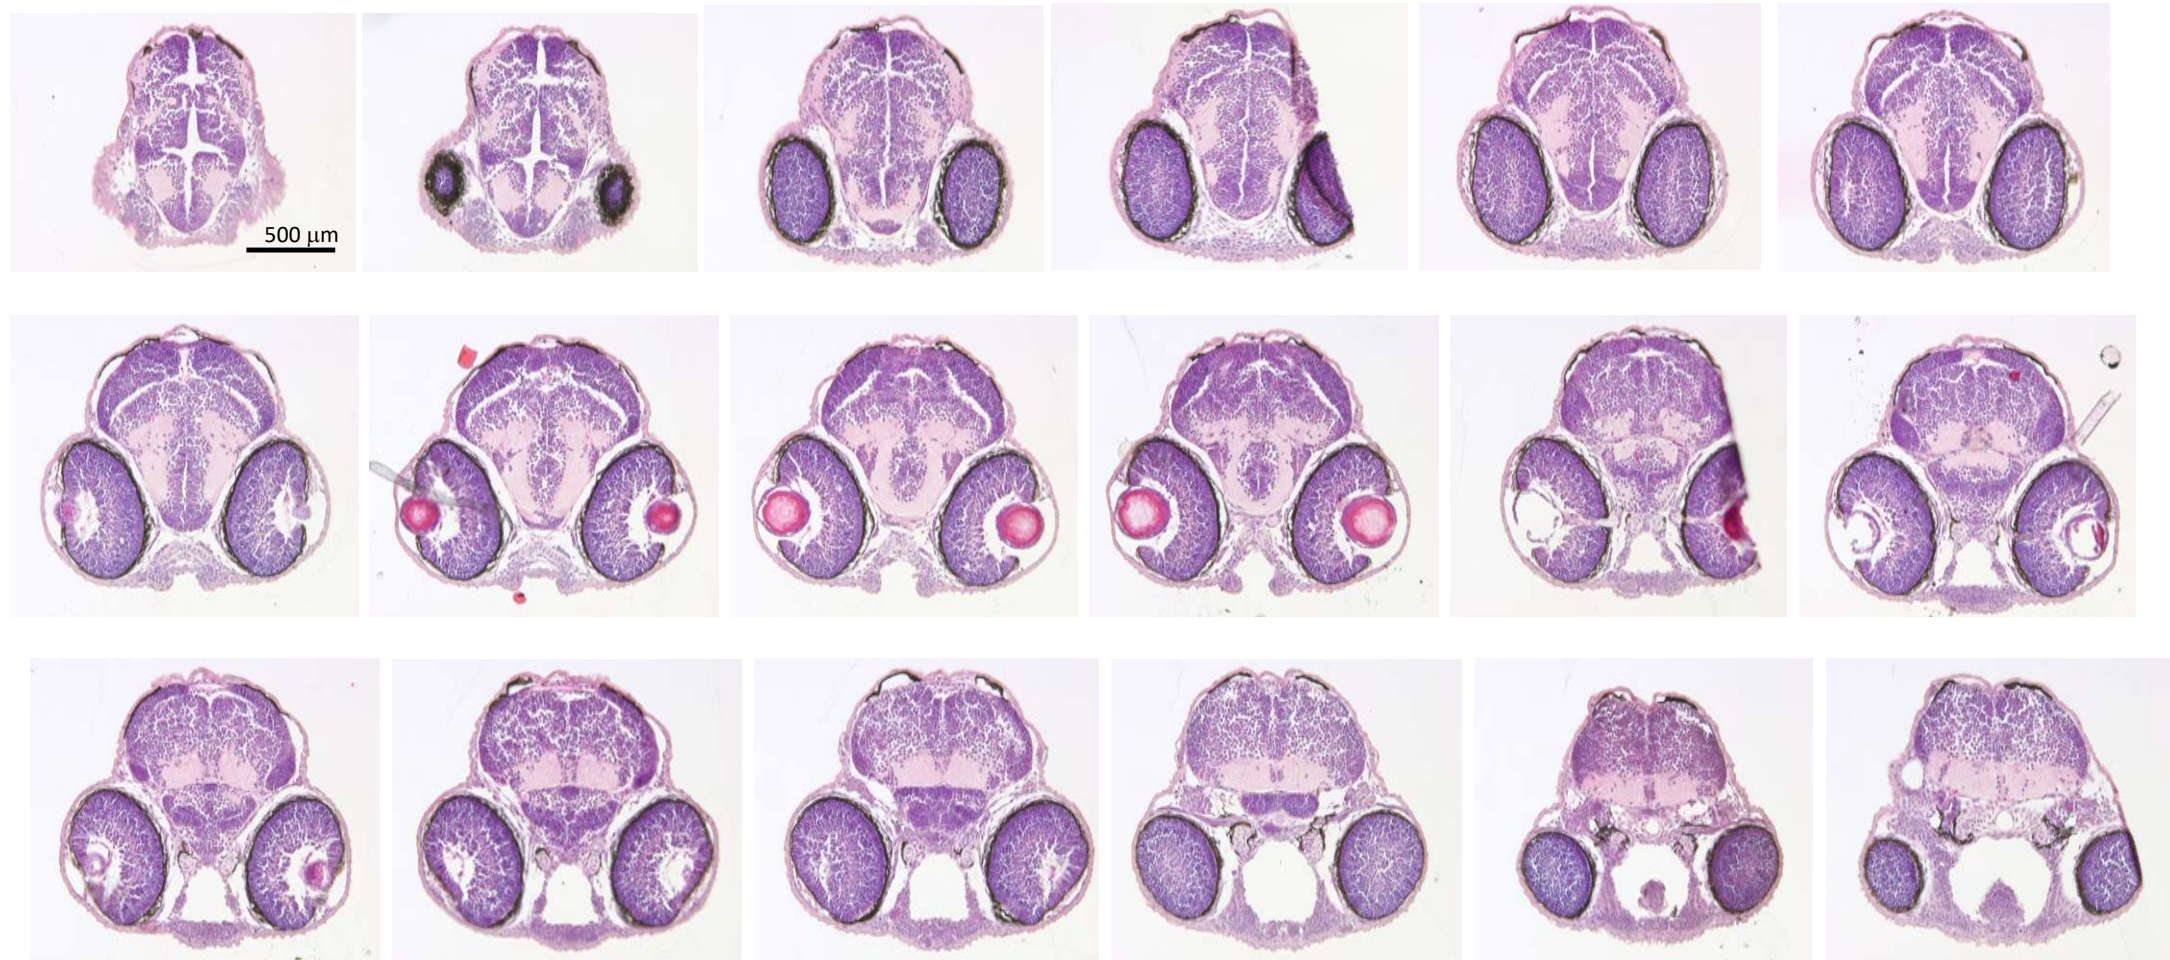



3 dpf *vars-/-*

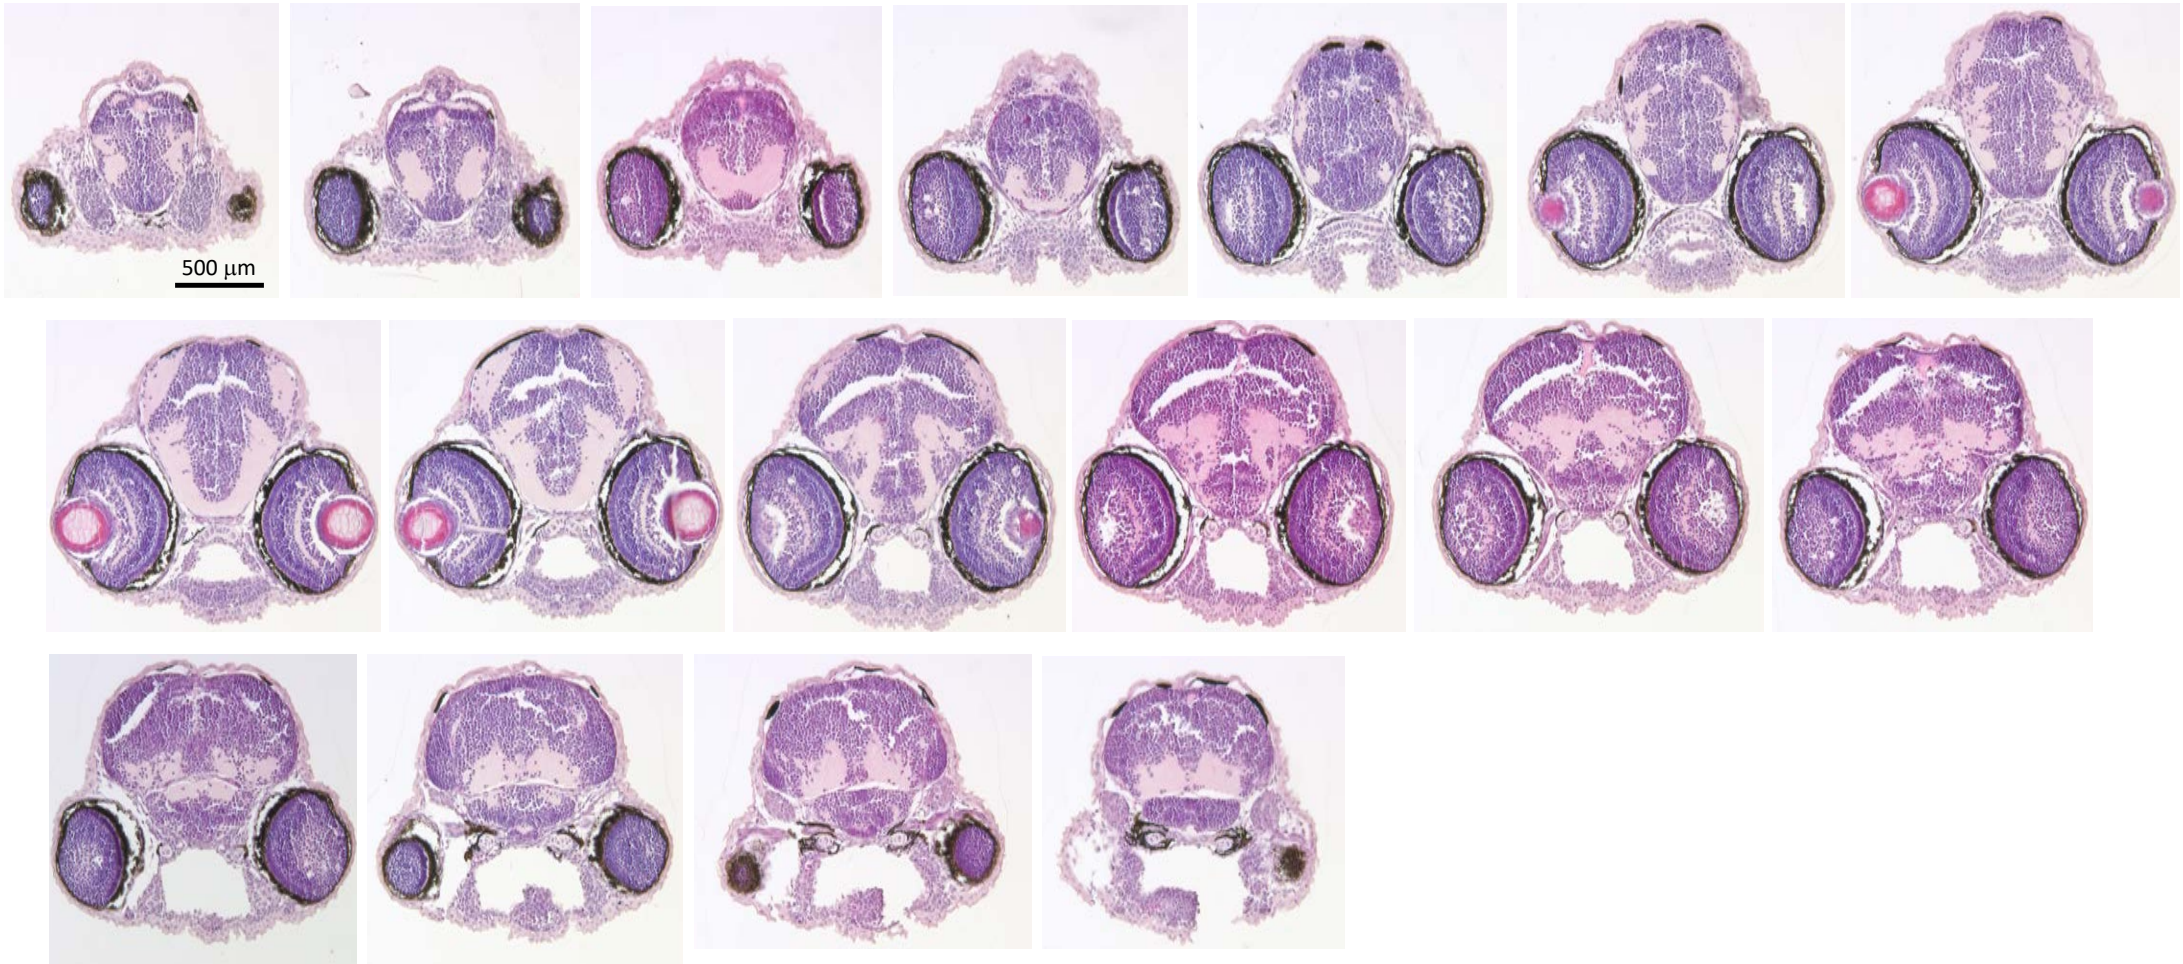

4 dpf *vars+/-*

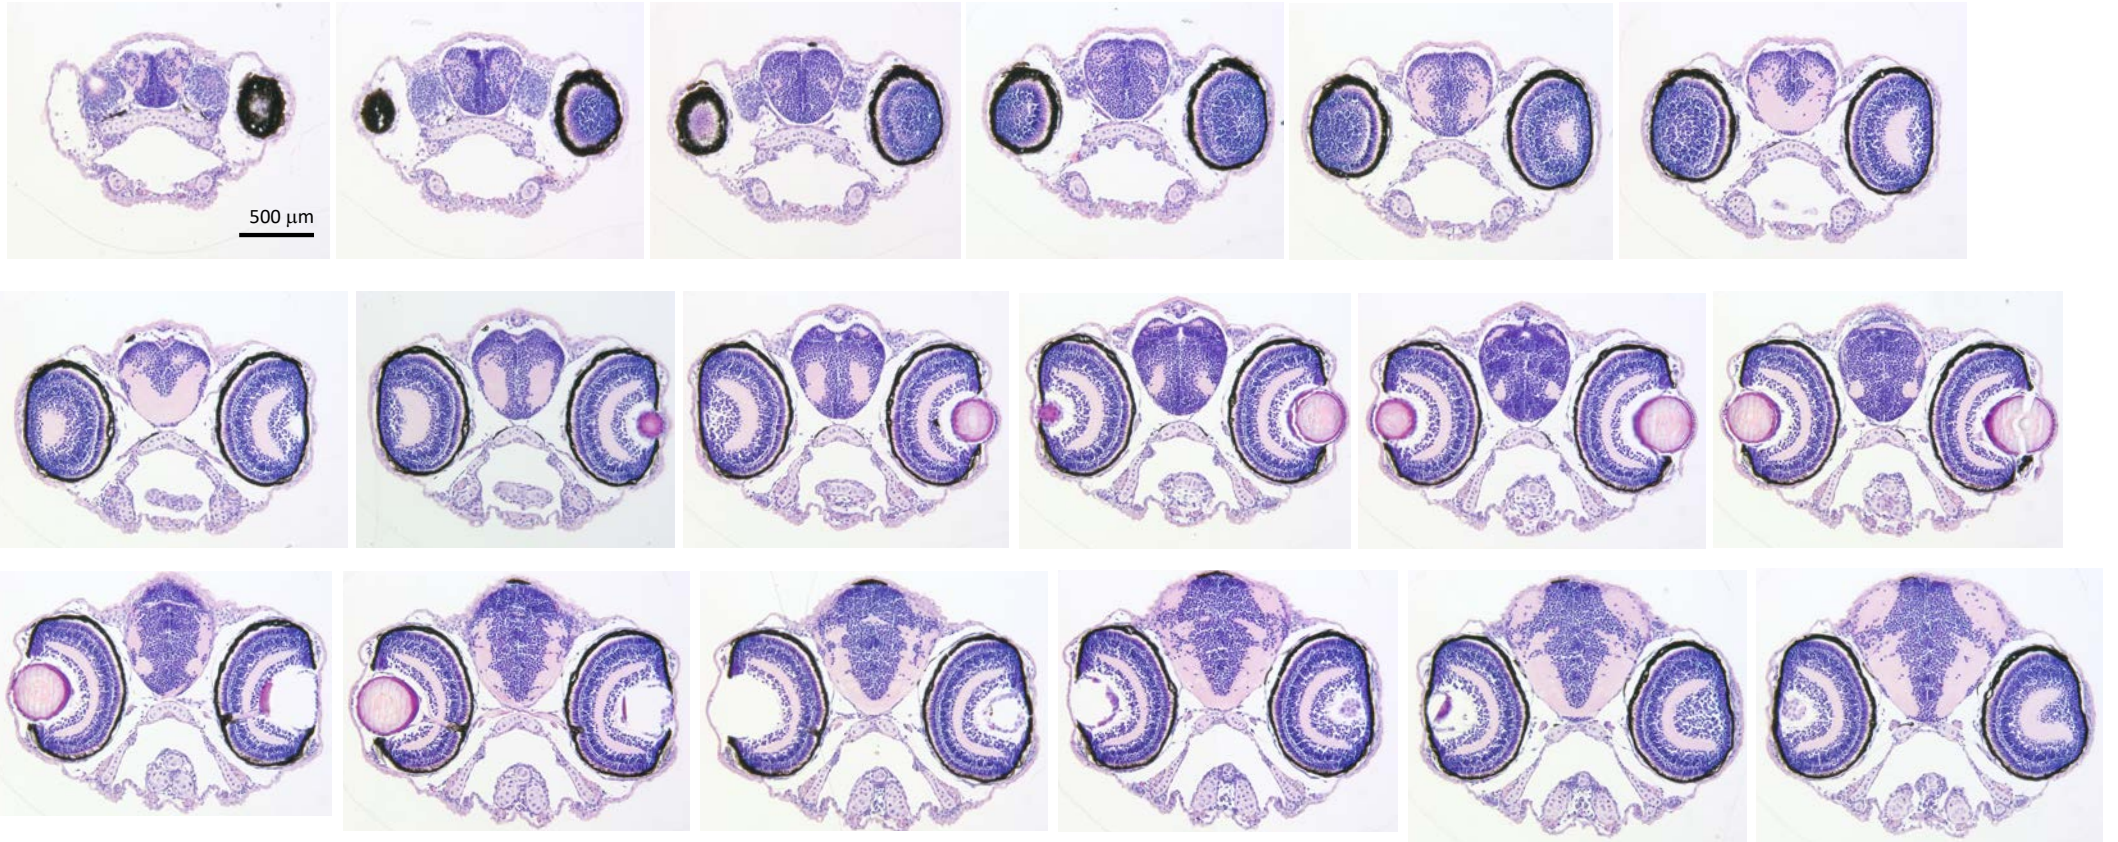

4 dpf *vars+/-*

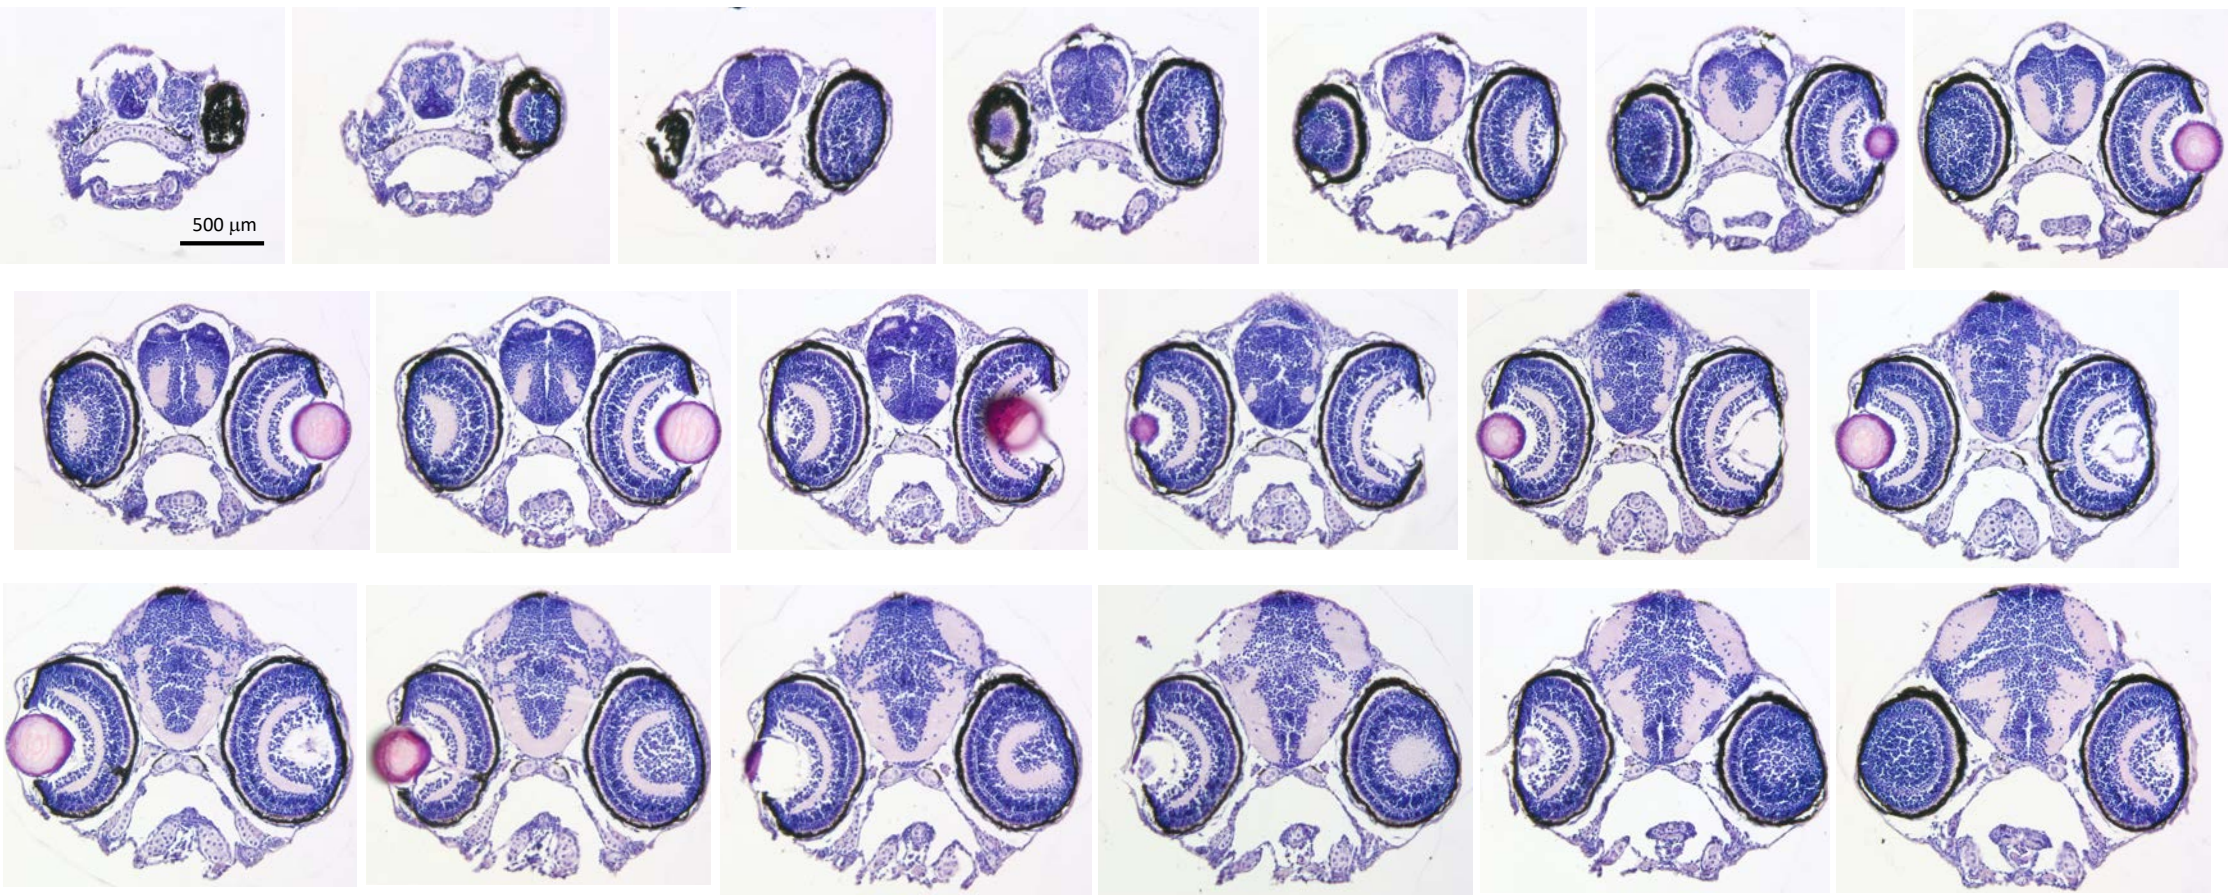

4 dpf *vars-/-*

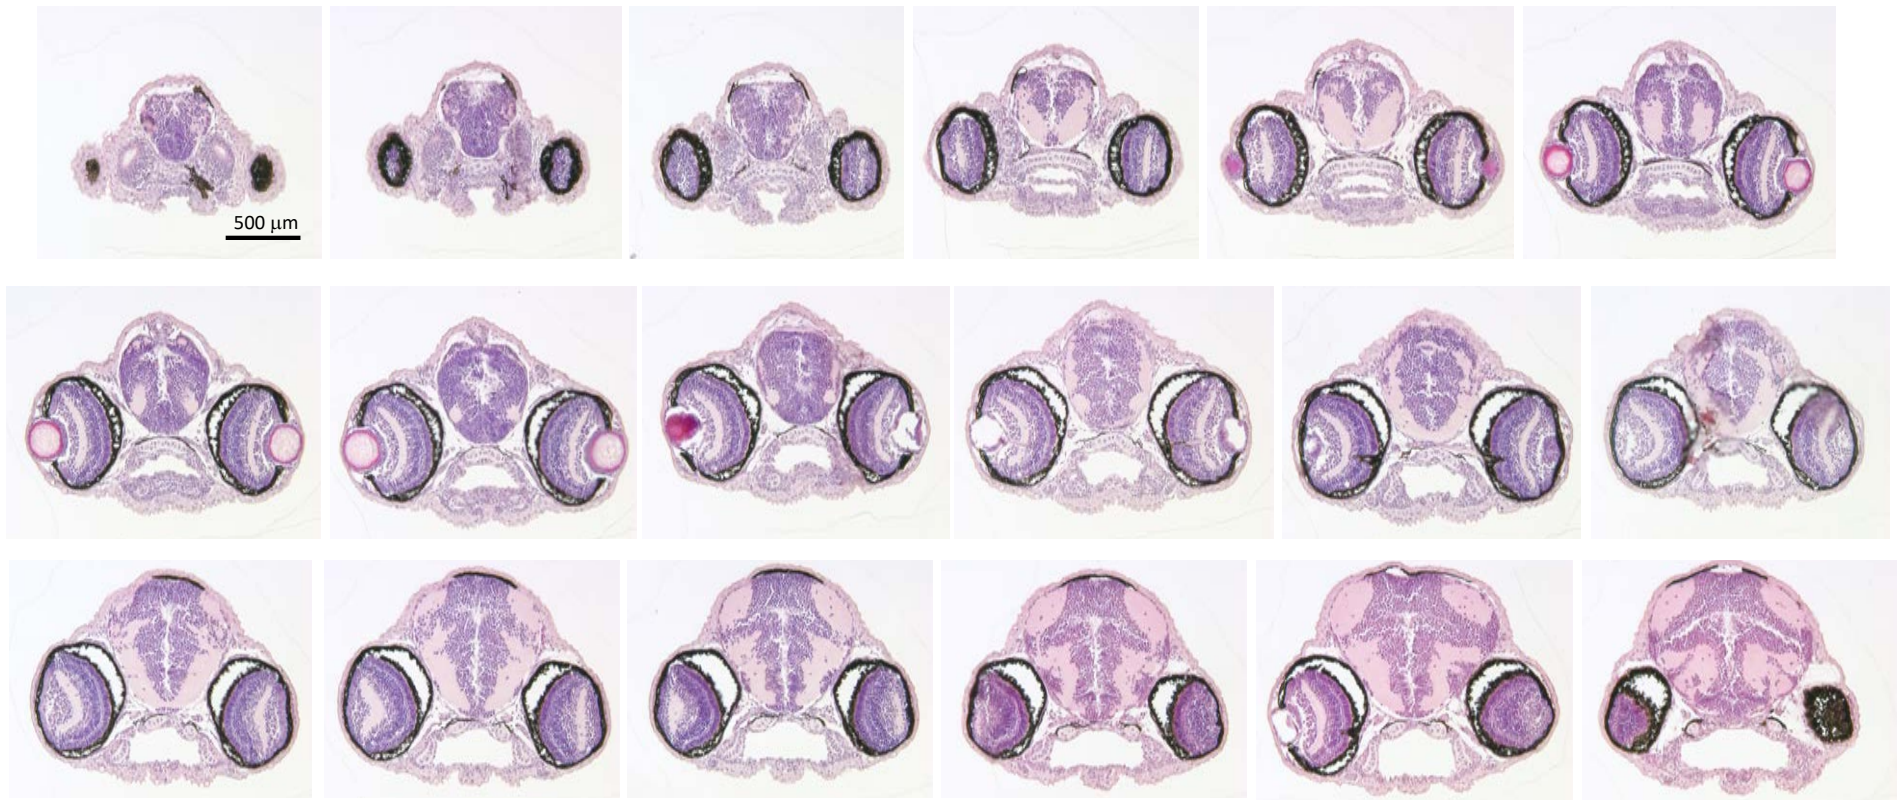

5 dpf *vars+/-*

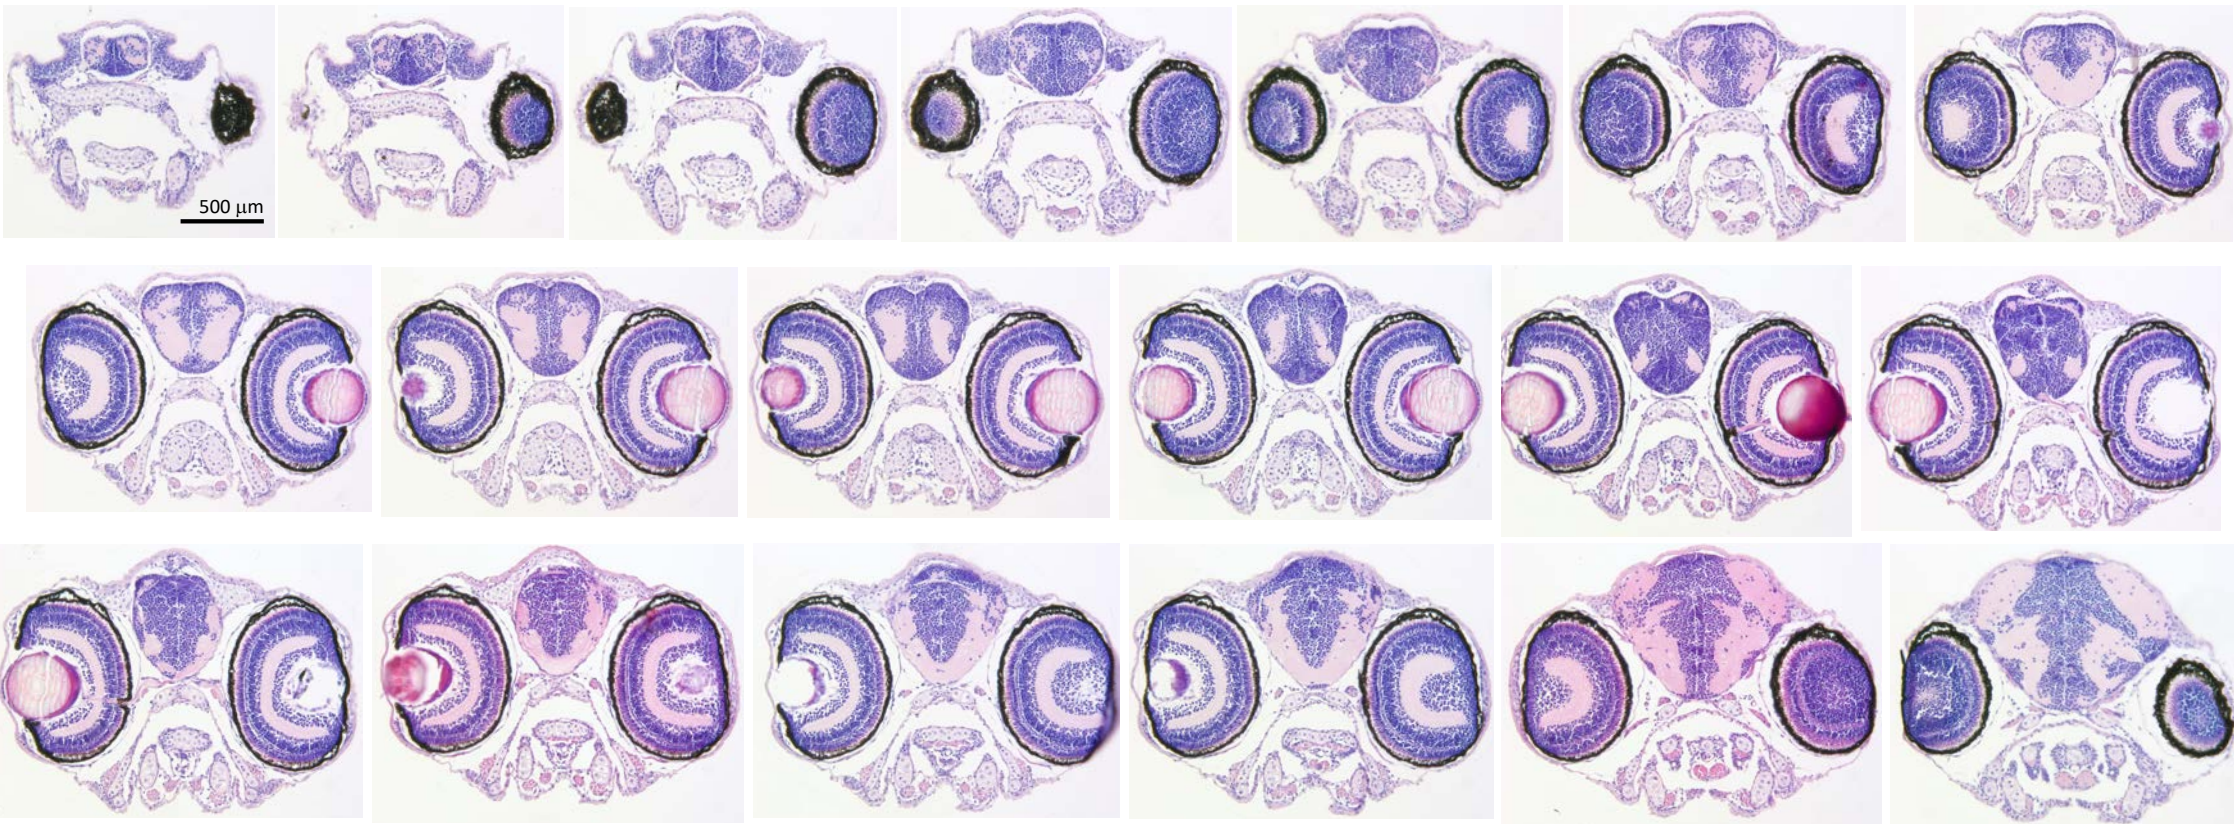

5 dpf *vars+/-*

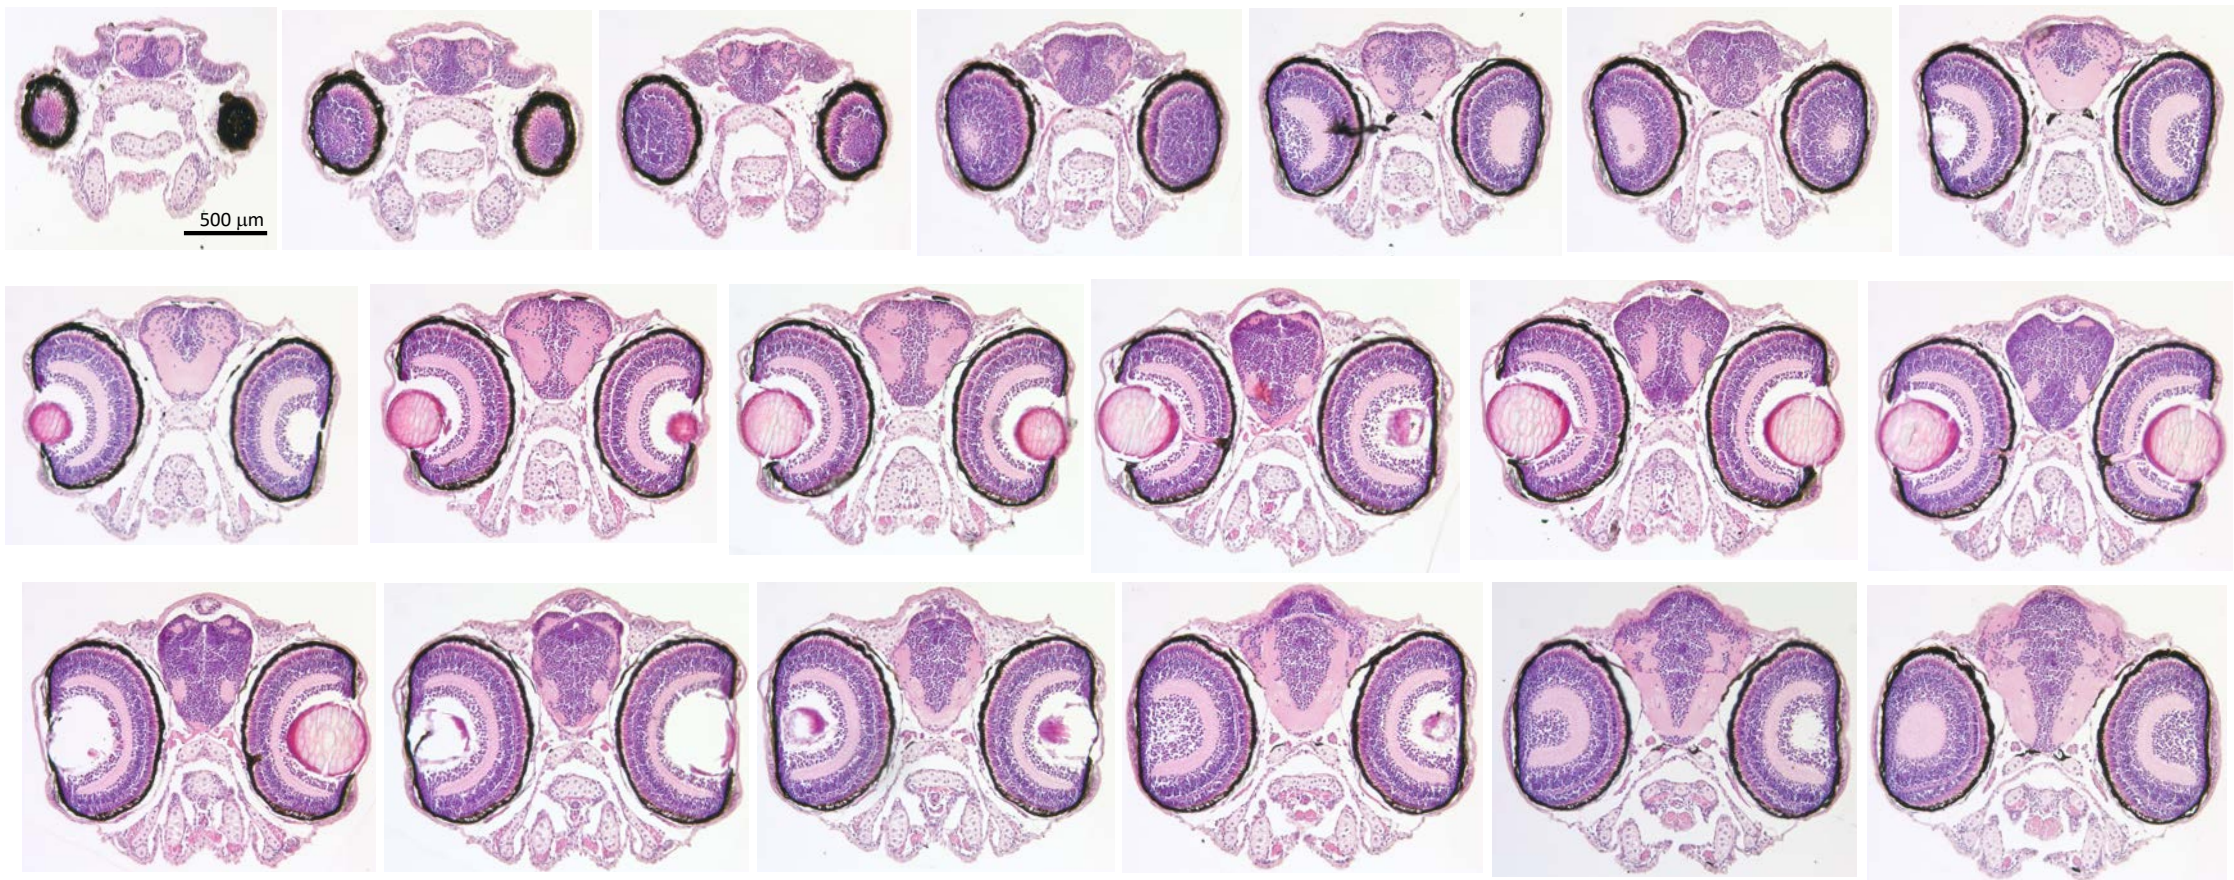

5 dpf *vars-/-*

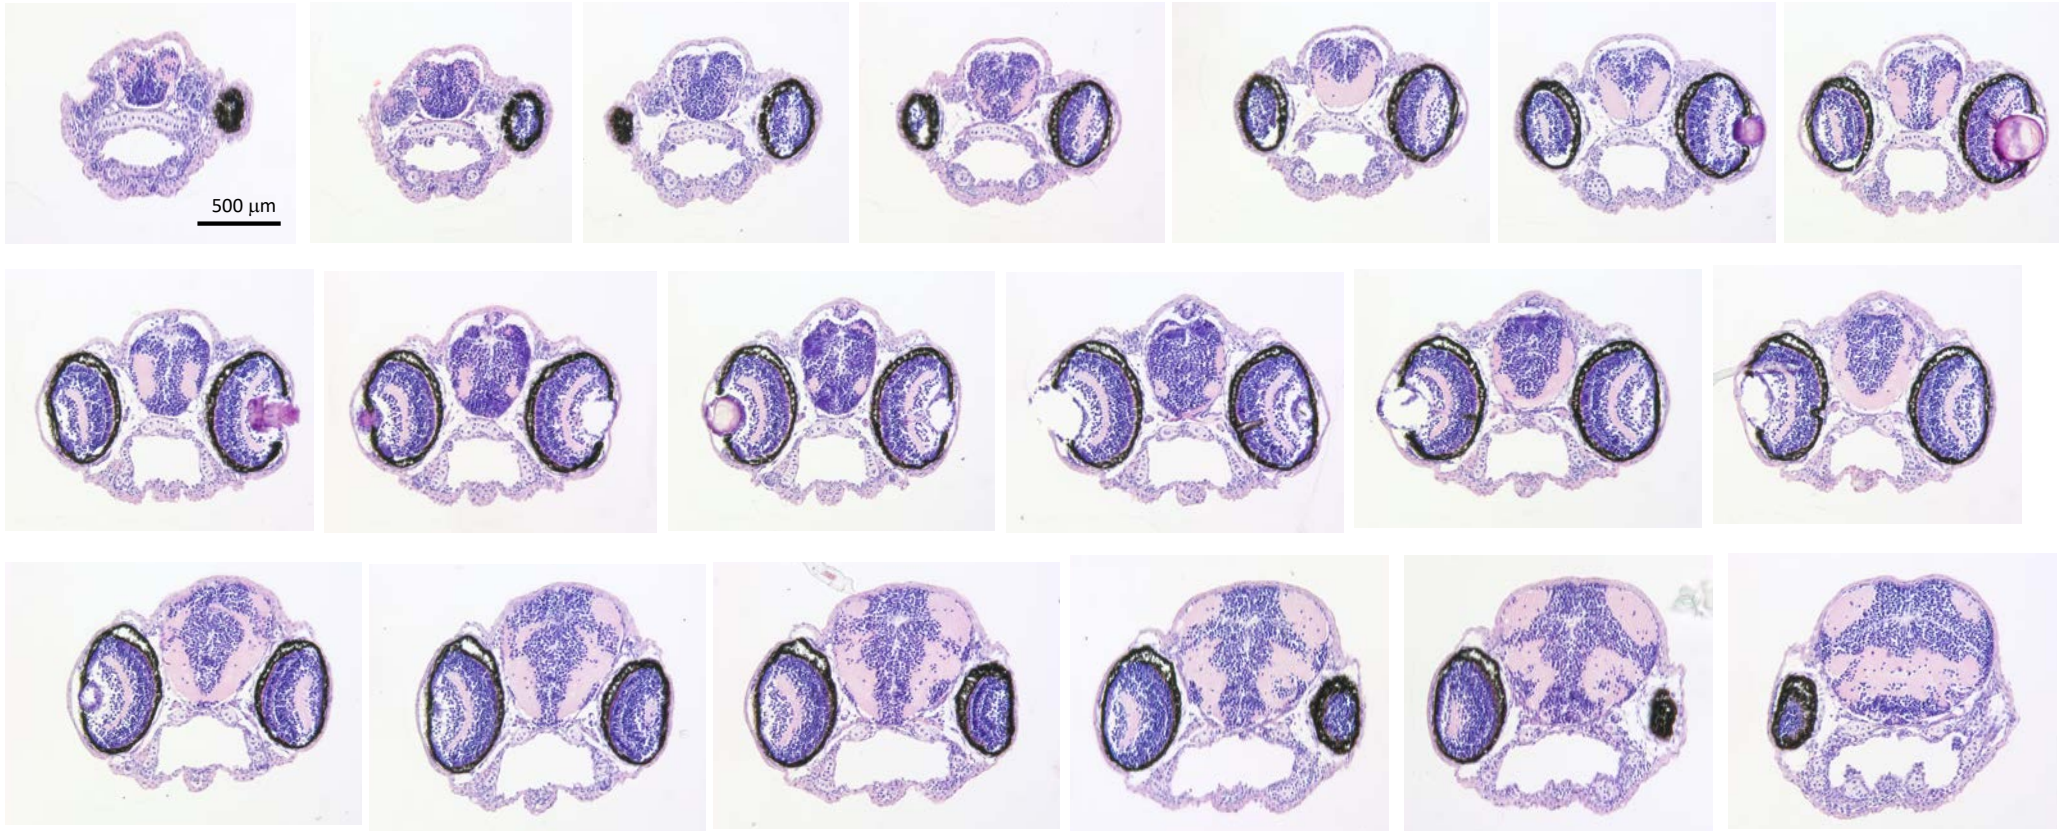

Supplement: 41467_2018_7953_MOESM5_ESM.pdf [file 41467_2018_7953_MOESM5_ESM.pdf]
