# Supplementary material for: Biallelic VARS variants cause developmental encephalopathy with microcephaly that is recapitulated in vars knockout zebrafish
Source: PubMed Central journal article supplement (PMC6372652; doi:10.1038/s41467-018-07953-w), 2019-02-12
Supplement: 41467_2018_7953_MOESM3_ESM.pdf [file 41467_2018_7953_MOESM3_ESM.pdf]

## Description of Additional Supplementary Files

File Name: Supplementary Data 1

Description: Detailed clinical information on all patients with bi-allelic VARS variants.

File Name: Supplementary Data 2

Description: A series of coronary sections from paraffin-embedded brains of 1-5 dpf vars+/, vars+/- and vars-/- larvae. For each group a representative larva was chosen.
